# Supplementary material for: Comment on “Climate consequences of hydrogen emissions” by Ocko and Hamburg (2022)
Source: Copernicus journal article supplement (doi:10.5194/acp-2022-810), 2022-12-19
Supplement: Supplementary file 1 [file acp-2022-810-supplement.pdf]

1  
2  
3  
4  
5  
6  
7  
8  
9  
10  
11  
12  
13  
14  
15  
16

Supporting Information for

**Comment on “Climate consequences of hydrogen emissions” by Ocko and  
Hamburg (2022)**

**Lei Duan<sup>1,2,\*</sup> and Ken Caldeira<sup>1,3</sup>**

<sup>1</sup>Carnegie Institution for Science, Stanford, California, USA.

<sup>2</sup>Orca Sciences LLC, Kirkland, Washington, USA.

<sup>3</sup>Breakthrough Energy LLC, Kirkland, Washington, USA.

\*Correspondence to: Lei Duan ([leiduan@carnegiescience.edu](mailto:leiduan@carnegiescience.edu))

**Text S1 to S2**

**Figure S1 to S15**

**Table S1 to S4**

17 **Text S1. Solutions with a continuous emission to  $tp$**

18 Warwick et al. (2022) considered a continuous emission scenario to the time  $tp$ . In our analytic  
 19 solutions, considering a continuous unit emission scenario to time  $tp$  where:

$$20 \quad \begin{cases} f_{H_2}(t) = 1, & \text{if } t \leq tp \\ f_{H_2}(t) = 0, & \text{if } t > tp \end{cases} \quad (S1)$$

21 Radiative forcing can be represented as:

$$22 \quad \widehat{R}_{H_2}(t) = \int_0^{\min(t, tp)} R_{H_2}(t - \tau) d\tau \quad (S2)$$

23 Radiative forcing is thus:

$$24 \quad \begin{aligned} R_{H_2, cont}(t) = & \frac{A_{CH_4}^* a_{CH_4} \tau_{H_2} \tau_{CH_4} \left( \tau_{H_2} e^{-\frac{t}{\tau_{H_2}}} \left( e^{\frac{tp}{\tau_{H_2}}} - 1 \right) - \tau_{CH_4} e^{-\frac{t}{\tau_{CH_4}}} \left( e^{\frac{tp}{\tau_{CH_4}}} - 1 \right) \right)}{\tau_{H_2} - \tau_{CH_4}} \\ & + \frac{A_{O_3} a_{O_3} \tau_{H_2} \tau_{O_3} \left( \tau_{H_2} e^{-\frac{t}{\tau_{H_2}}} \left( e^{\frac{tp}{\tau_{H_2}}} - 1 \right) - \tau_{O_3} e^{-\frac{t}{\tau_{O_3}}} \left( e^{\frac{tp}{\tau_{O_3}}} - 1 \right) \right)}{\tau_{H_2} - \tau_{O_3}} \\ & + \frac{A_{H_2O} a_{H_2O} \tau_{H_2} \tau_{H_2O} \left( \tau_{H_2} e^{-\frac{t}{\tau_{H_2}}} \left( e^{\frac{tp}{\tau_{H_2}}} - 1 \right) - \tau_{H_2O} e^{-\frac{t}{\tau_{H_2O}}} \left( e^{\frac{tp}{\tau_{H_2O}}} - 1 \right) \right)}{\tau_{H_2} - \tau_{H_2O}} \end{aligned} \quad (S3)$$

25 Correspondingly, the time-integrated radiative forcing under a continuous emission scenario to  
 26 time  $tp$  is:

$$27 \quad CAGWP_{H_2}(H) = \frac{A_{CH_4}^* a_{CH_4} \tau_{H_2} \tau_{CH_4} \left( \tau_{H_2}^2 e^{\frac{-H}{\tau_{H_2}}} \left( e^{\frac{tp}{\tau_{H_2}}} - 1 \right) - \tau_{CH_4}^2 e^{\frac{-H}{\tau_{CH_4}}} \left( e^{\frac{tp}{\tau_{CH_4}}} - 1 \right) + tp(\tau_{CH_4} - \tau_{H_2}) \right)}{\tau_{CH_4} - \tau_{H_2}} \\ 28 \quad + \frac{A_{O_3} a_{O_3} \tau_{H_2} \tau_{O_3} \left( \tau_{H_2}^2 e^{\frac{-H}{\tau_{H_2}}} \left( e^{\frac{tp}{\tau_{H_2}}} - 1 \right) - \tau_{O_3}^2 e^{\frac{-H}{\tau_{O_3}}} \left( e^{\frac{tp}{\tau_{O_3}}} - 1 \right) + tp(\tau_{O_3} - \tau_{H_2}) \right)}{\tau_{O_3} - \tau_{H_2}} \quad (S4)$$

$$30 \quad + \frac{A_{H_2O} a_{H_2O} \tau_{H_2} \tau_{H_2O} \left( \tau_{H_2}^2 e^{\frac{-H}{\tau_{H_2}}} \left( e^{\frac{tp}{\tau_{H_2}}} - 1 \right) - \tau_{H_2O}^2 e^{\frac{-H}{\tau_{H_2O}}} \left( e^{\frac{tp}{\tau_{H_2O}}} - 1 \right) + tp(\tau_{H_2O} - \tau_{H_2}) \right)}{\tau_{H_2O} - \tau_{H_2}}$$

31 Note that this equation differs slightly from that given in Warwick et al. (2022), which included a  
32 minor mistake in integration bounds.

33 The corresponding equations for continuous emissions of CO<sub>2</sub> and CH<sub>4</sub> to time  $tp$  can be  
34 represented as:

$$35 \quad R_{CO_2,cont}(t) = A_{CO_2} \left( a_0 tp + \sum_{i=1}^3 a_i \tau_i e^{-\frac{t}{\tau_i}} \left( e^{\frac{tp}{\tau_i}} - 1 \right) \right) \quad (S5)$$

$$36 \quad R_{CH_4,cont}(t) = (1 + f_1 + f_2) A_{CH_4} \tau_{CH_4} e^{-\frac{t}{\tau_{CH_4}}} \left( e^{\frac{tp}{\tau_{CH_4}}} - 1 \right) \quad (S6)$$

37 And CAGWP for continuous emissions of CO<sub>2</sub> and CH<sub>4</sub> to time  $tp$  is:

$$38 \quad CAGWP_{CO_2}(H) = \frac{A_{CO_2}}{2} \left( a_0 tp(2H - tp) + \sum_{i=1}^3 2a_i \tau_i \left( tp - \tau_i e^{-\frac{H}{\tau_i}} \left( e^{\frac{tp}{\tau_i}} - 1 \right) \right) \right) \quad (S7)$$

$$39 \quad CAGWP_{CH_4}(H) = (1 + f_1 + f_2) A_{CH_4} \tau_{CH_4} \left( tp - \tau_{CH_4} e^{-\frac{H}{\tau_{CH_4}}} \left( e^{\frac{tp}{\tau_{CH_4}}} - 1 \right) \right) \quad (S8)$$

40 **Text S2. CAGWP components from analytic solutions**

41 In this section, we show equations calculating the three components used in Ocko and Hamburg  
 42 (2022), which are denoted as CAGWP here. These equations are derived based on analytic  
 43 solutions as discussed in the main text and are considered for continuous emissions scenarios.  
 44 The physical meanings of these equations are explained in Warwick et al. (2022).  
 45 The first component ( $CAGWP_{i_1}$ ) represents radiative forcing caused by chemical perturbations  
 46 to radiative forcing during the emission period  $tp$ :

$$47 \quad CAGWP_{i_1}(H) = \frac{A_i a_i \tau_{H_2} \tau_i \left( \tau_{H_2} \left( \left( 1 - e^{-\frac{tp}{\tau_{H_2}}} \right) - tp \right) - \tau_i \left( \left( 1 - e^{-\frac{tp}{\tau_i}} \right) - tp \right) \right)}{\tau_i - \tau_{H_2}} \quad (S1)$$

48 Where  $A_i$  is the scaling factor that converts molar mass of species  $i$  (i.e.,  $CH_4$ ,  $O_3$ , or  $H_2O$ ) to  
 49  $W m^{-2}$ ,  $a_i$  is the factor representing the impact of remaining hydrogen in the atmosphere on the  
 50 atmospheric molar mass of different species,  $\tau_i$  is the lifetime of different species,  $\tau_{H_2}$  is the  
 51 lifetime of  $H_2$ , and  $tp$  is the emission period.

52 The second component ( $CAGWP_{i_2}$ ) represents the chemical perturbation to radiative forcing at  
 53 timescale  $H$  resulting from the emitted species remaining in the atmosphere following the end of  
 54 the emission period:

$$55 \quad CAGWP_{i_2}(H) = \frac{A_i a_i \tau_{H_2}^2 \tau_i \left( 1 - e^{-\frac{tp}{\tau_{H_2}}} \right) \left( \tau_{H_2} \left( e^{-\frac{tp}{\tau_{H_2}} - \frac{H}{\tau_{H_2}}} \right) + \tau_i e^{-\frac{tp}{\tau_{H_2}}} \left( e^{\frac{tp}{\tau_i} \frac{H}{\tau_i - 1}} \right) \right)}{\tau_i - \tau_{H_2}} \quad (S2)$$

56 The third component ( $CAGWP_{i_3}$ ) is the decay of radiative forcing generated during continuous  
 57 emission period  $tp$ :

$$58 \quad CAGWP_{i_3}(H) = \frac{A_i a_i \tau_{H_2} \tau_i^2 e^{-\frac{H\tau_{H_2} + tp(\tau_i + \tau_{H_2})}{\tau_i \tau_{H_2}}} \left( e^{\frac{H}{\tau_i}} - e^{\frac{tp}{\tau_i}} \right) \left( \tau_{H_2} e^{\frac{tp}{\tau_i}} \left( 1 - e^{-\frac{tp}{\tau_{H_2}}} \right) - \tau_i e^{\frac{tp}{\tau_{H_2}}} \left( 1 - e^{-\frac{tp}{\tau_i}} \right) \right)}{\tau_i - \tau_{H_2}} \quad (S3)$$

59 As in Ocko and Hamburg (2022), the overall CAGWP for each species  $i$  under given period  $tp$   
 60 and timescale  $H$  is:

$$61 \quad CAGWP_i(H) = CAGWP_{i_1}(H) + CAGWP_{i_2}(H) + CAGWP_{i_3}(H) \quad (S4)$$

62 And CAGWP for emissions of hydrogen is:

$$63 \quad CAGWP_{H_2}(H) = (1 + f_1 + f_2) CAGWP_{CH_4}(H) + CAGWP_{O_3}(H) + CAGWP_{H_2O}(H) \quad (S5)$$

64 Comparisons between our newly derived equations and equations used in Ocko and Hamburg  
65 (2022) are shown in Figure S11. In addition, we tested our solutions by calculating the following  
66 cases:

67 **Case 1:** set  $tp = 2$  and  $H = 2$ , which represents CAGWP at year 2 for a 2-year emission;

68 **Case 2:** set  $tp = 1$  and  $H = 2$ , which represents CAGWP at year 2 for a 1-year emission;

69 **Case 3:** set  $tp = 1$  and  $H = 1$ , which represents CAGWP at year 1 for a 1-year emission.

70 For a linear system, CAGWP for case 1 should equal the sum of CAGWP for case 2 and case 3.

71 Equations from our analytic solutions give the same numerical values for the above cases,

72 indicating robustness of our conceptual solutions.

73 **Figure S1.** Ratios of climate impact. Same as Figure 1, but showing ratios of the climate impact  
74 of methane and hydrogen to carbon dioxide emissions. While the residence time of hydrogen is  
75 substantially shorter than that of methane, hydrogen emissions result in an increase in methane  
76 concentration that decay on the methane time scale. Thus, while the effects of methane and  
77 hydrogen differ in magnitude, the temporal pattern of response is similar in both cases.

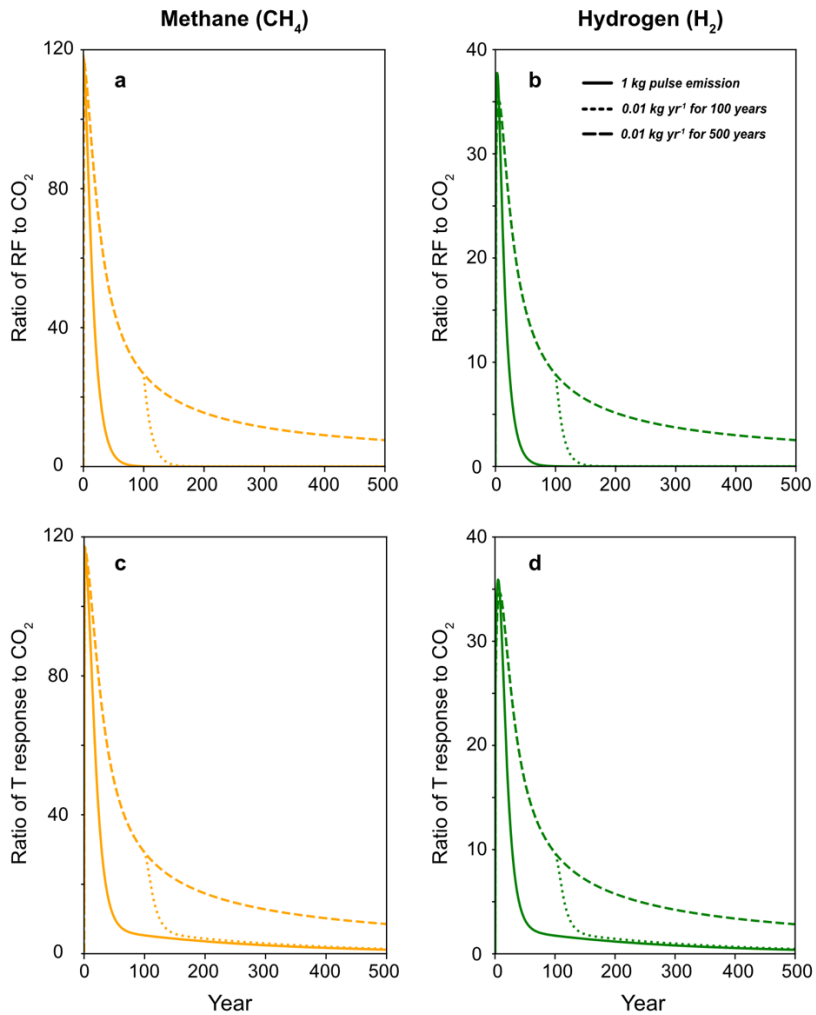

78

79 **Figure S2.** Climate impact from emissions of different species. Similar to Figure 1, but for 1 ppb  
 80 increase scenarios. Note that CH<sub>4</sub> generates substantially more climate impacts and has a y-axis  
 81 scale that is 24 times the y-axis of H<sub>2</sub> and CO<sub>2</sub>.

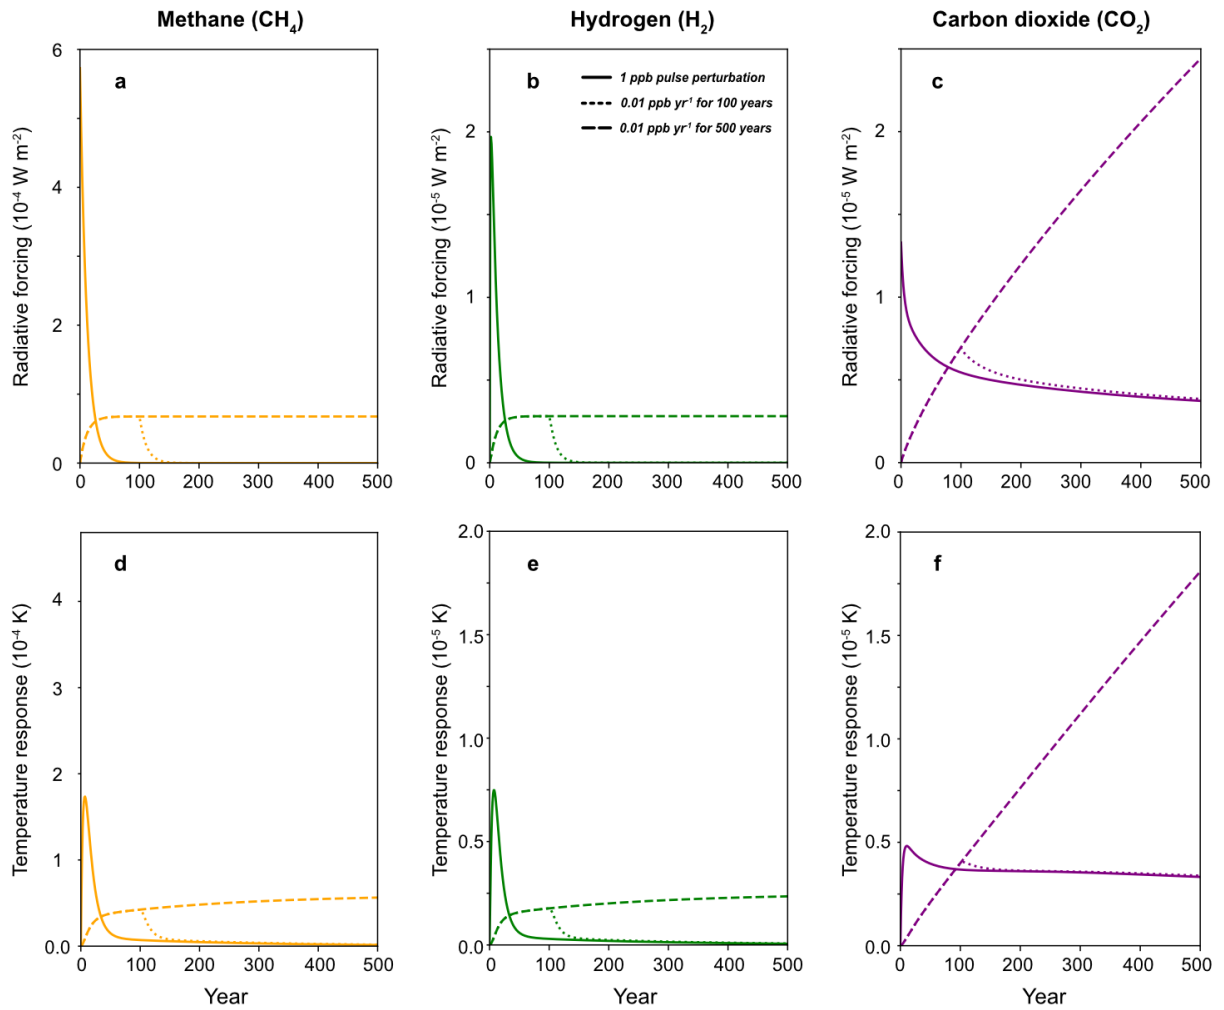

82

83 **Figure S3.** Impact of considering decayed CH<sub>4</sub> to CO<sub>2</sub>. In contrast to our central cases where  
84 CH<sub>4</sub> decays over time, here we consider the conversion of decayed CH<sub>4</sub> to CO<sub>2</sub>, which has a  
85 longer lifetime and adds a long-term climate impact to the warming potential of methane.

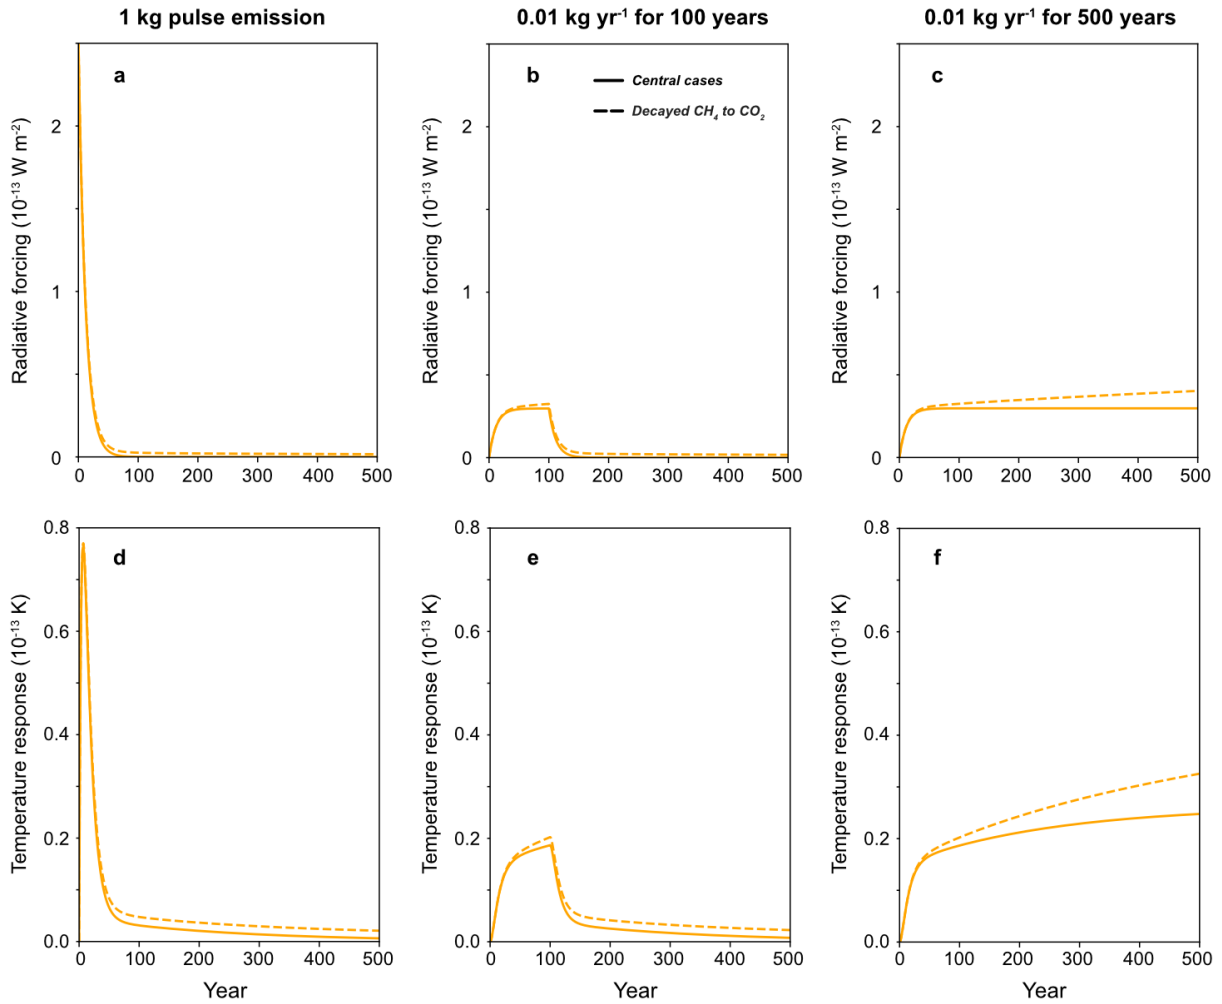

86



87 **Figure S4.** Climate impact from different hydrogen lifetimes. Radiative forcing and the global  
88 mean temperature response from emission of hydrogen under different scenarios. Solid line  
89 shows results under our central case, and shaded area represents results considering different  
90 hydrogen lifetimes (i.e., 1.4 years and 2.5 years).

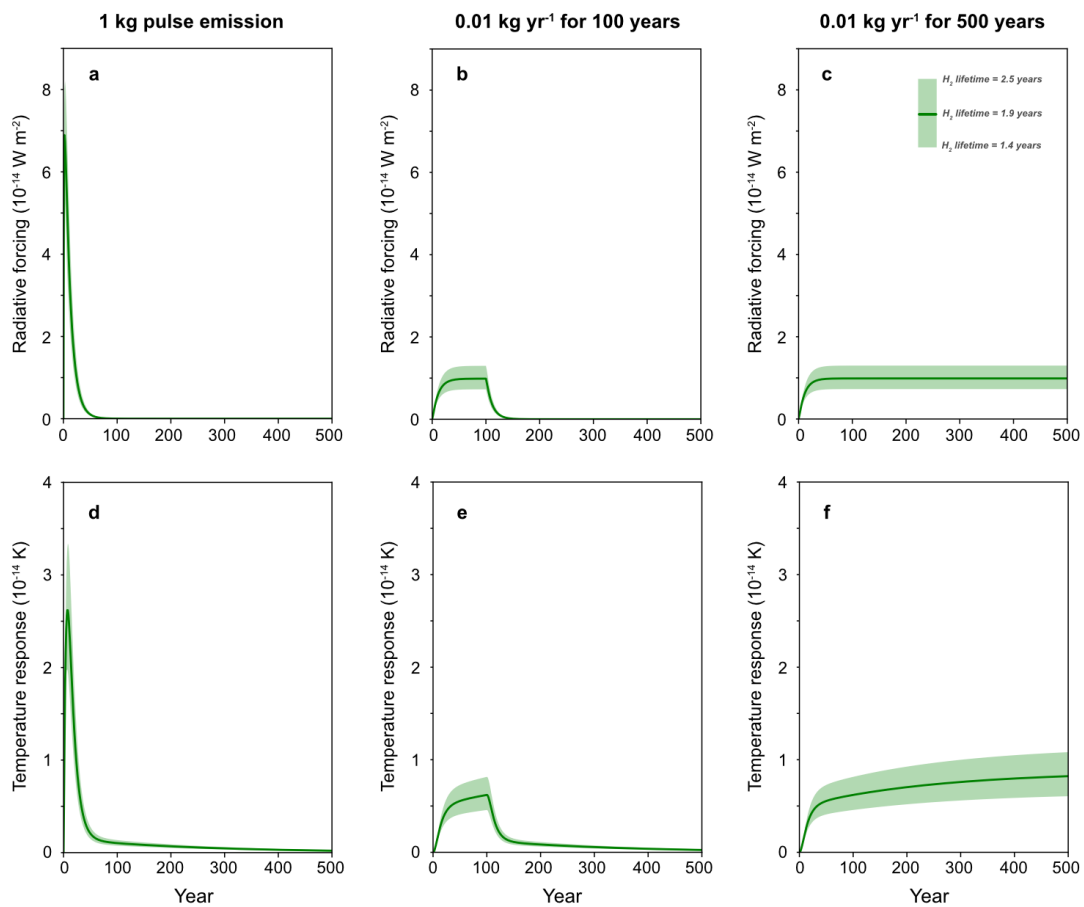

91

92 **Figure S5.** Contributions of methane and hydrogen to hydrogen warming potentials. Here we  
 93 show contributions of hydrogen and methane to increases in radiative forcing and global mean  
 94 temperature response between the low and high leakage cases. Our results show that additional  
 95 leakages of methane (3 % in the high leakage case vs. 1 % in the low leakage case) contribute  
 96 more warming to blue hydrogen, with hydrogen leakages (10 % in the high leakage case vs. 1 %  
 97 in the low leakage case) playing a less important role. Results showing contributions for per  
 98 percentage increase in leakage rate are plotted in **Figure S15**.

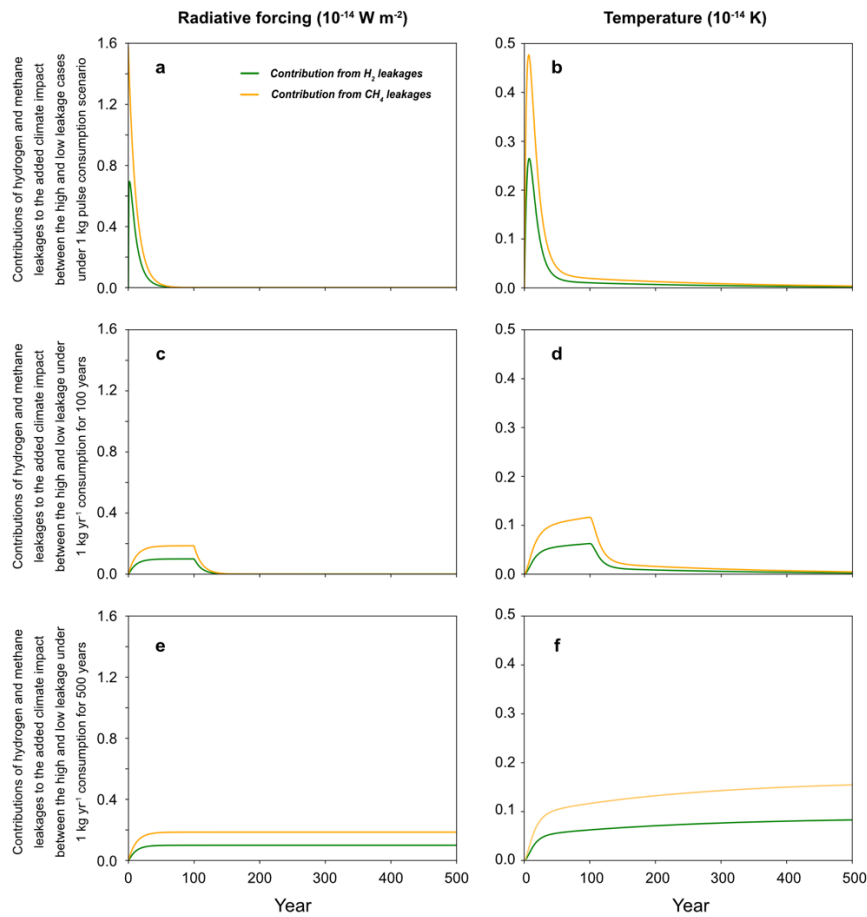

99

100 **Figure S6.** Factors influencing radiative forcing. Same as Figure 2, but considering radiative  
 101 forcing changes associated with different parameters. These include: considering different  
 102 hydrogen lifetimes (1.4 years or 2.5 years), include methane leakage for the avoided CO<sub>2</sub>  
 103 emissions, and considering the conversion of the decayed methane to CO<sub>2</sub>. The last two factors  
 104 have substantial impacts on the climate impact of fossil fuels and the net climate impact of clean  
 105 hydrogen, whereas hydrogen lifetime shows only a minor impact on our results.

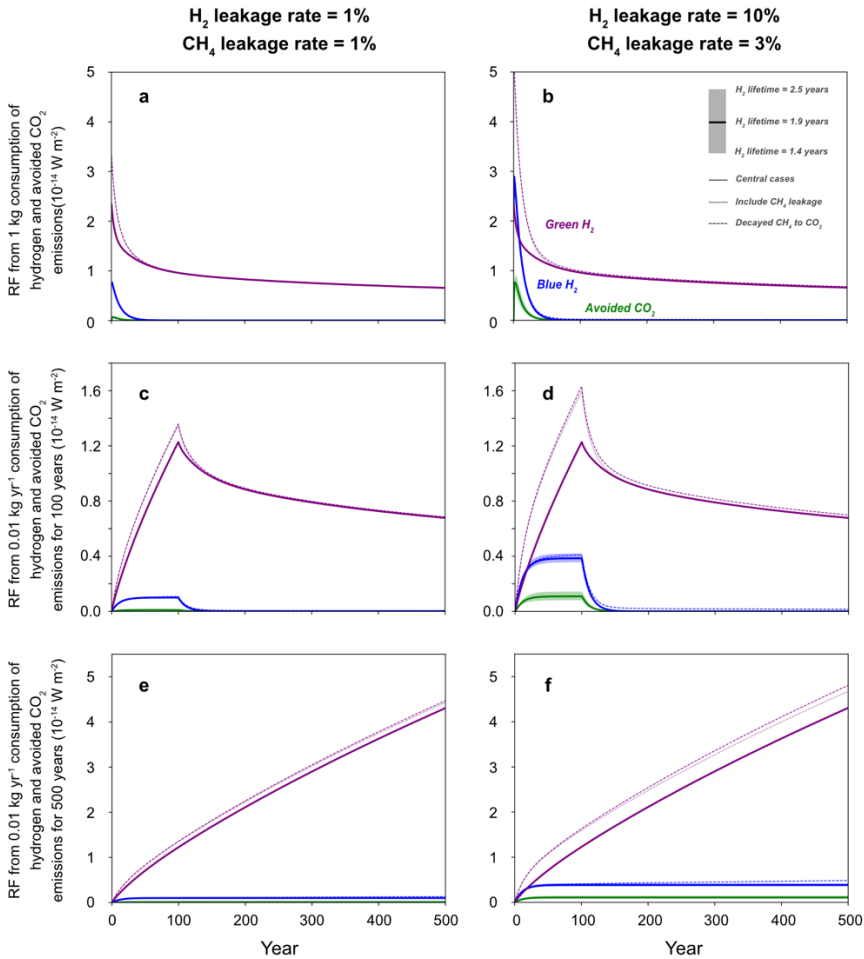

106

107 **Figure S7.** Factors influencing temperature response. Same as Figure S6, but considering  
 108 temperature instead of radiative forcing.

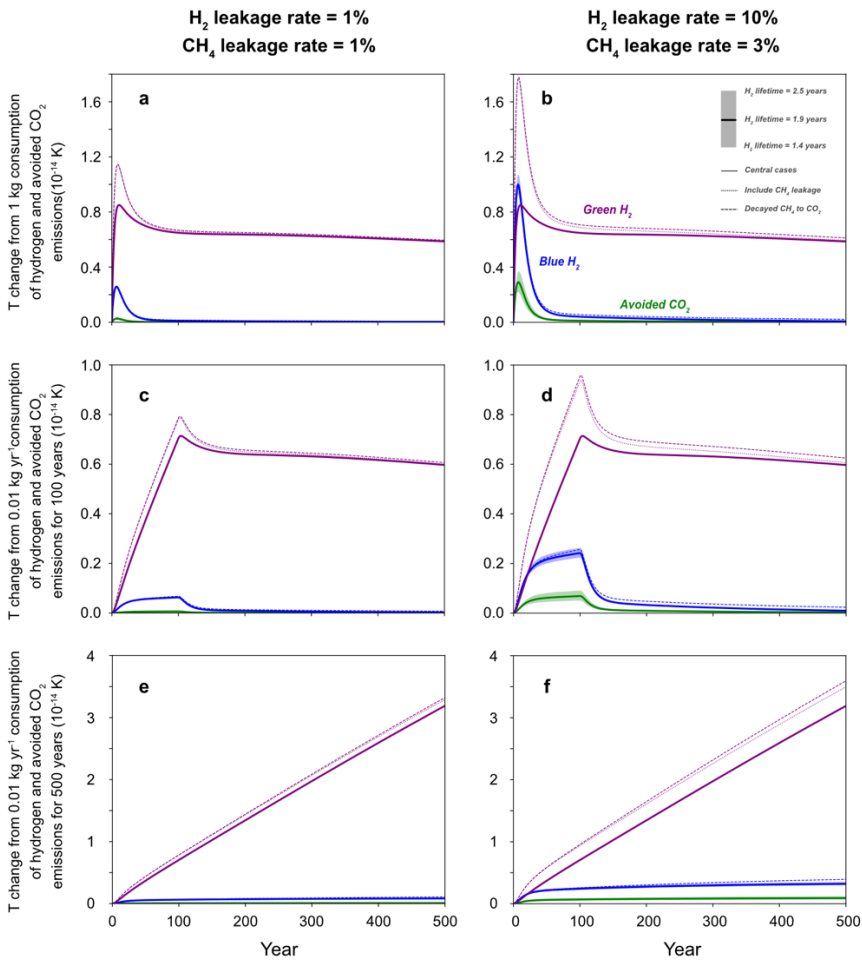

109

110 **Figure S8.** Uncertainty of avoided CO<sub>2</sub> amount. Radiative forcing and global mean temperature  
 111 response under different assumptions of the avoided CO<sub>2</sub> amount per kg hydrogen consumption.  
 112 Solid line represents results for our central case (11 kg) and shaded area represents results under  
 113 alternative assumptions (i.e., 5 kg and 15 kg).

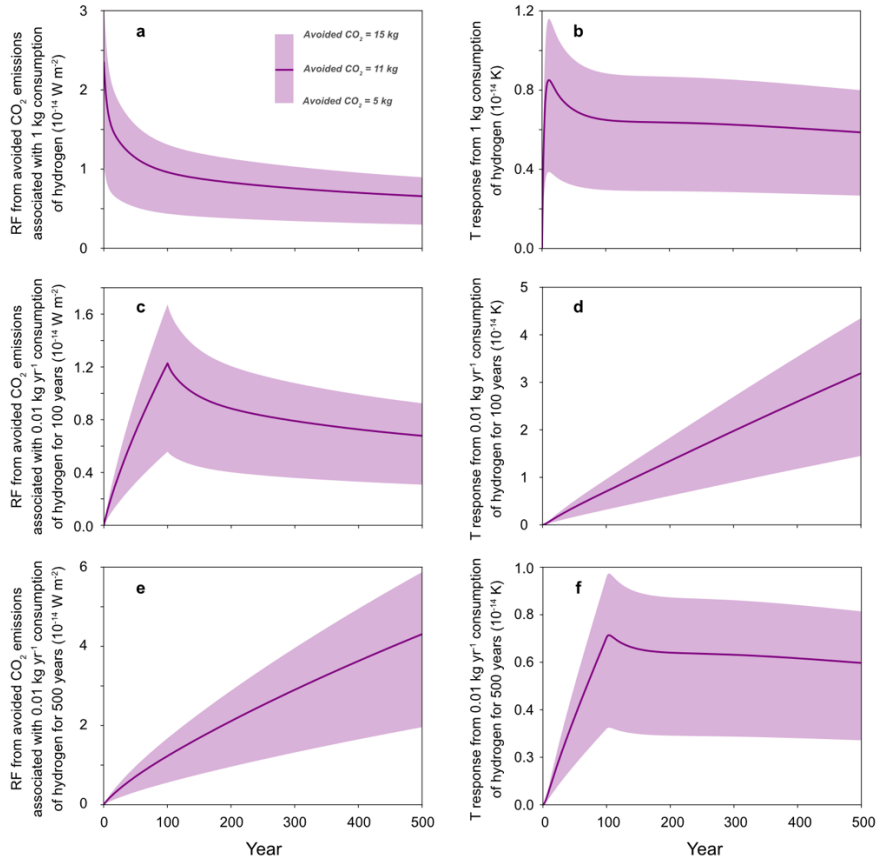

114

115 **Figure S9.** Uncertainty of the climate response function. Same as Figure 3, but combining the  
116 radiative forcing equations with different climate response functions.

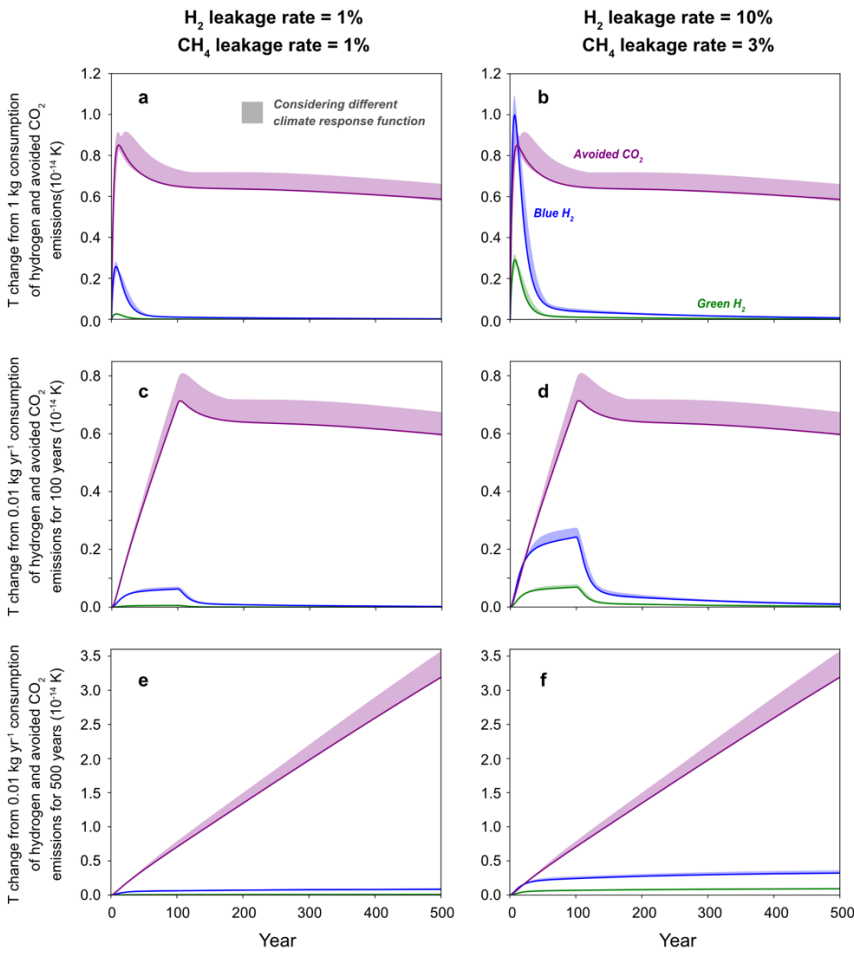

117

118 **Figure S10.** Comparisons of different metrics. Ratios of the time-integrated relative radiative  
119 forcing (CGWP) and ratios of the global mean temperature response (GTP) are compared under  
120 continuous emission scenarios. The solid lines are the ratios of the time-integrated radiative  
121 forcing shown in Figure 2 panel e and f, and dashed lines are the ratios of the temperature  
122 changes shown in Figure 3 panel e and f.

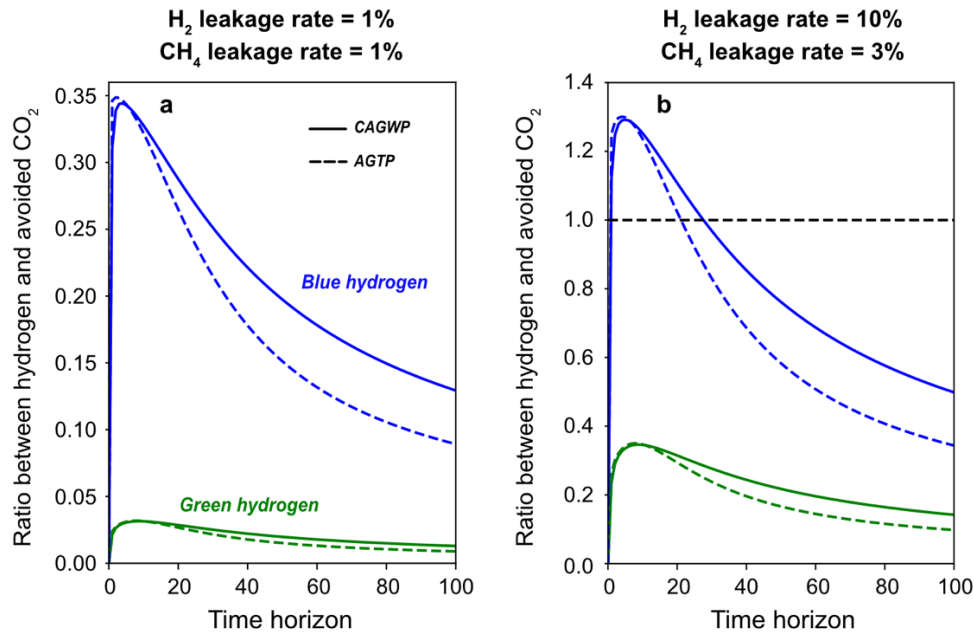

123

124 **Figure S11.** Comparisons between results from our newly derived equations and those used in  
125 Ocko and Hamburg (2022). Time-integrated radiative forcing (CAGWP defined in this analysis)  
126 from one-year emission and continuous emission scenarios are compared.

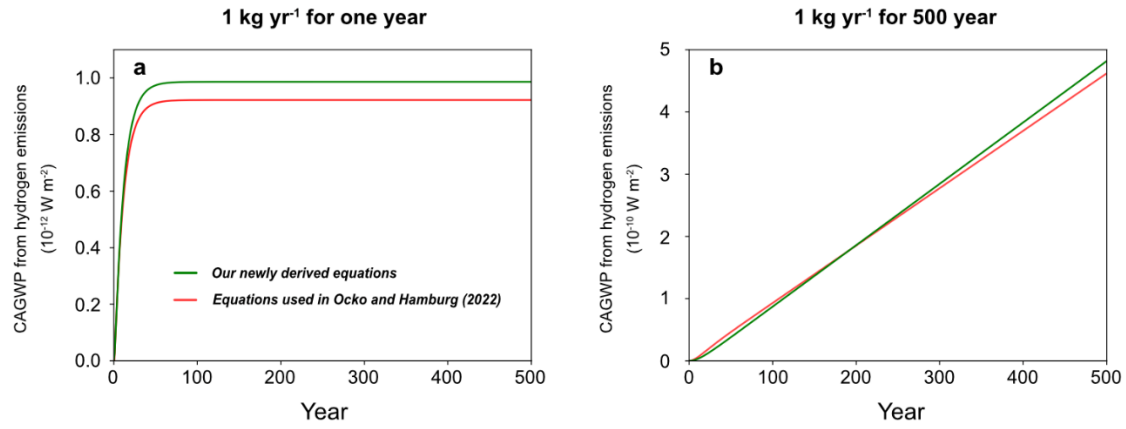

127



128 **Figure S12.** Similar to Figure 1 but for 100-year timescale.

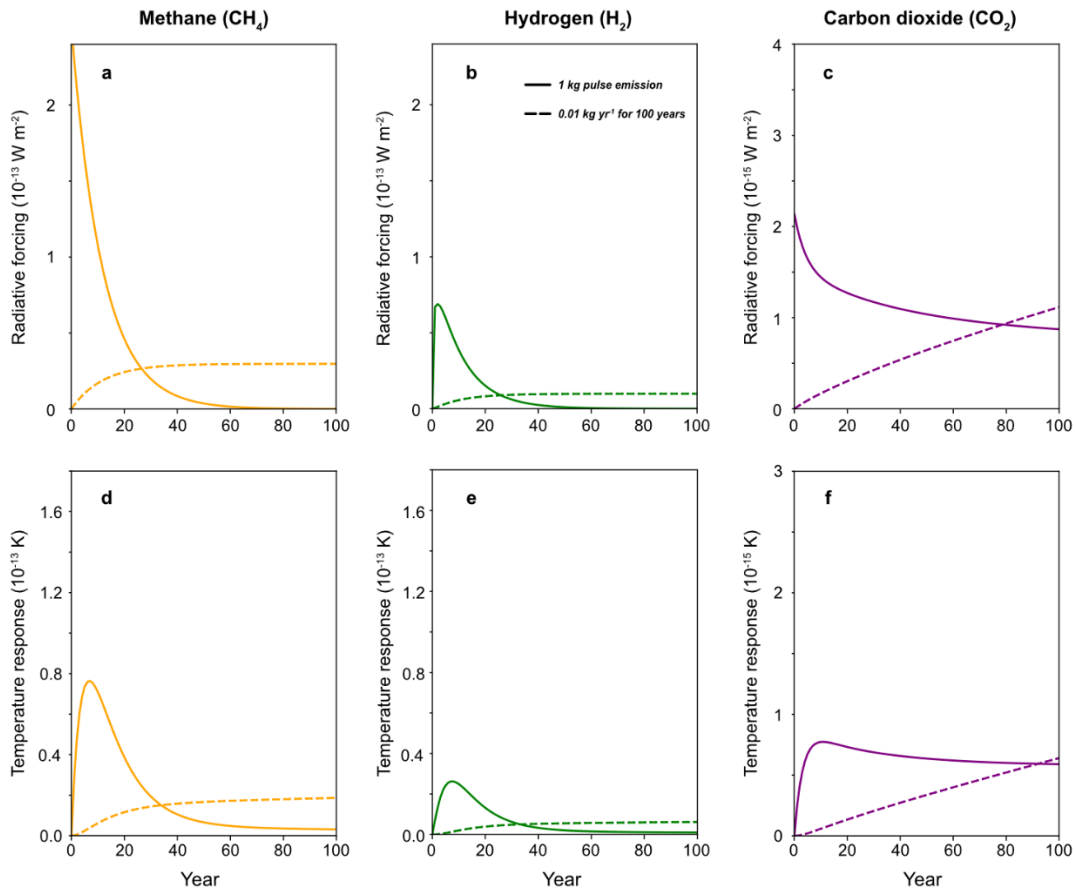

129

130 **Figure S13.** Similar to Figure 2 but for 100-year timescale.

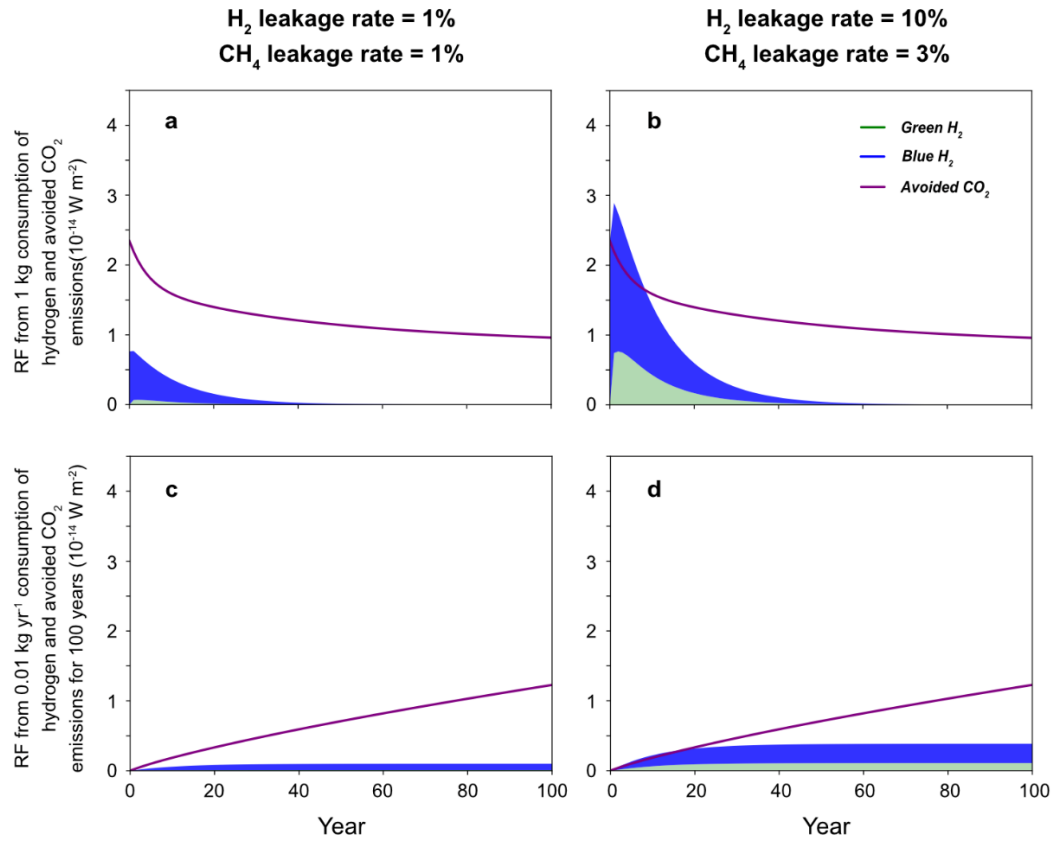

131

132 **Figure S14.** Similar to Figure 3 but for 100-year timescale.

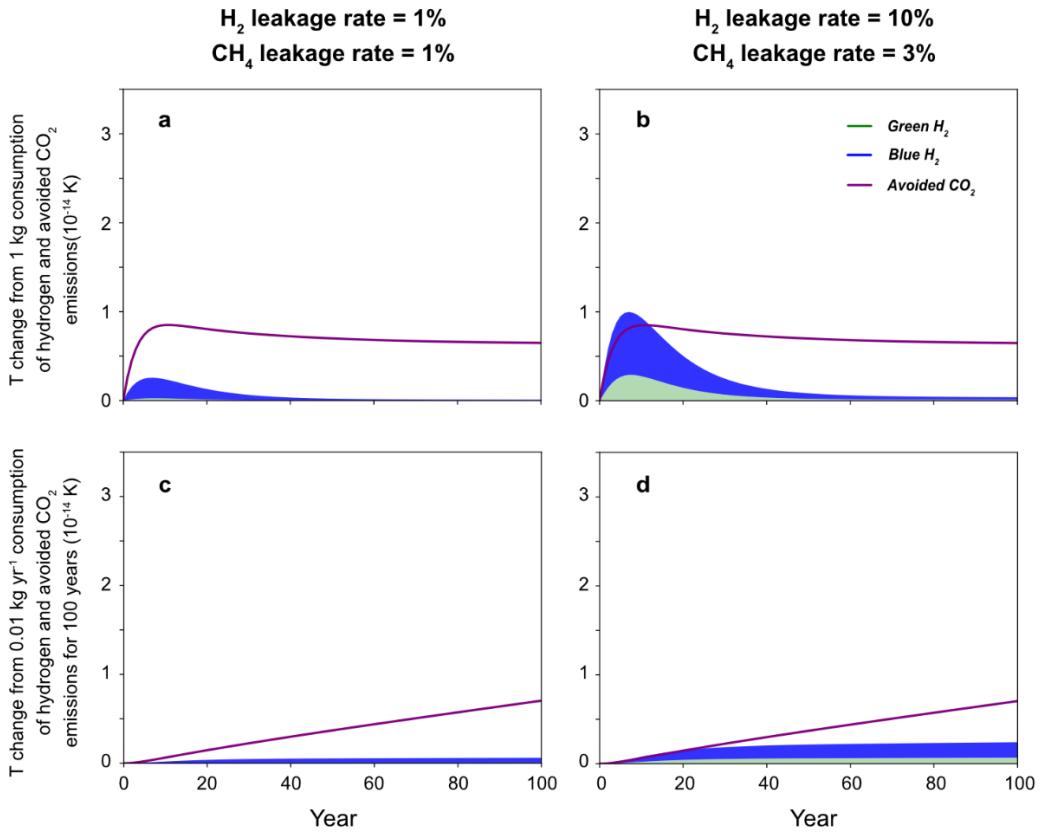

133

134 **Figure S15.** Similar to **Figure S5** but showing increases in climate impact for per percentage  
 135 increase in the methane and hydrogen leakage rate.

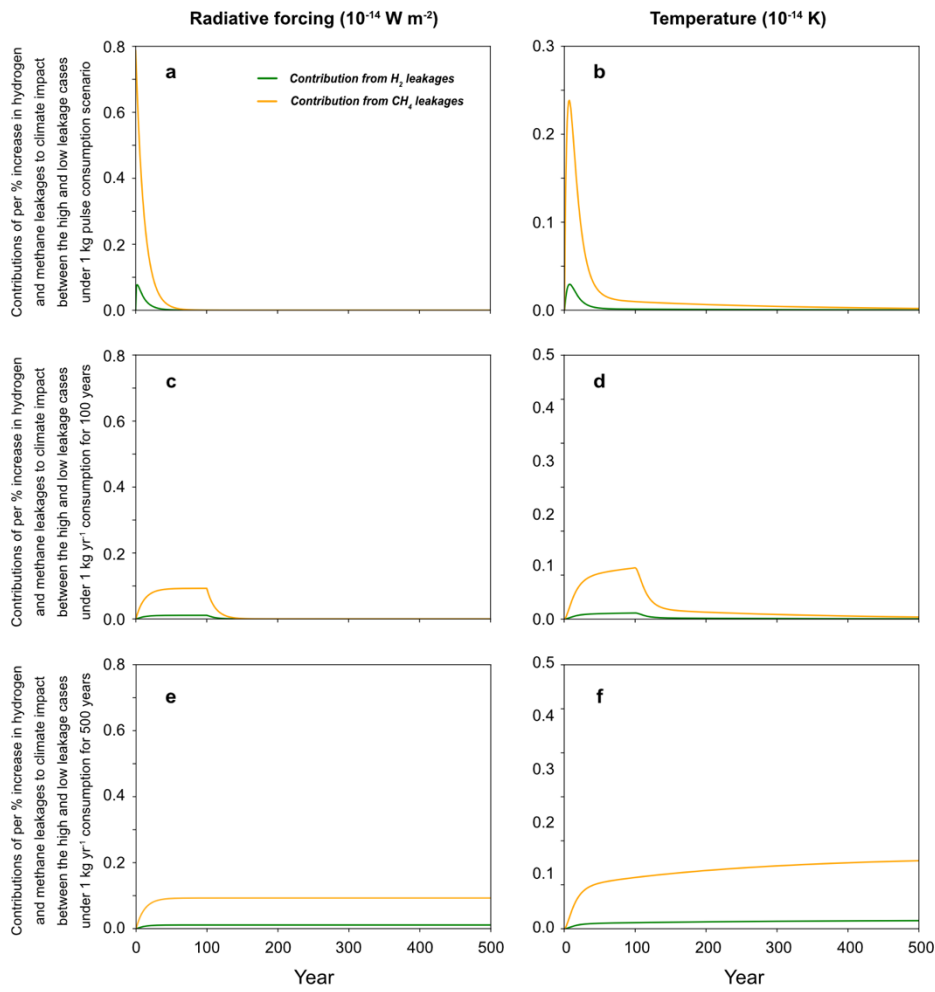

136

137 **Table S1.** Radiative forcing, absolute global warming potential (AGWP), absolute global  
 138 temperature change potential (AGTP), and their ratios for 1 kg pulse emission of hydrogen,  
 139 methane, and carbon dioxide under different timescales (i.e., 20, 100, and 500 years).

| Time horizon                                |      |                                     | 20      | 100     | 500      |
|---------------------------------------------|------|-------------------------------------|---------|---------|----------|
| Hydrogen (H <sub>2</sub> )                  | RF   | 10 <sup>-15</sup> W m <sup>-2</sup> | 15.17   | 0.01    | 0.00     |
|                                             | AGWP | 10 <sup>-15</sup> W m <sup>-2</sup> | 818.78  | 986.26  | 986.43   |
|                                             | AGTP | 10 <sup>-15</sup> K                 | 13.18   | 1.03    | 0.20     |
| Methane (CH <sub>4</sub> )                  | RF   | 10 <sup>-15</sup> W m <sup>-2</sup> | 46.25   | 0.05    | 0.00     |
|                                             | AGWP | 10 <sup>-15</sup> W m <sup>-2</sup> | 2426.52 | 2971.65 | 2972.27  |
|                                             | AGTP | 10 <sup>-15</sup> K                 | 38.68   | 3.11    | 0.61     |
| Carbon dioxide (CO <sub>2</sub> )           | RF   | 10 <sup>-15</sup> W m <sup>-2</sup> | 1.27    | 0.87    | 0.60     |
|                                             | AGWP | 10 <sup>-15</sup> W m <sup>-2</sup> | 30.35   | 111.61  | 391.55   |
|                                             | AGTP | 10 <sup>-15</sup> K                 | 0.73    | 0.59    | 0.53     |
| Ratio of H <sub>2</sub> to CO <sub>2</sub>  | RF   | Unitless                            | 11.94   | 0.02    | 4.39E-17 |
|                                             | AGWP | Unitless                            | 26.97   | 8.84    | 2.52     |
|                                             | AGTP | Unitless                            | 18.02   | 1.74    | 0.38     |
| Ratio of CH <sub>4</sub> to CO <sub>2</sub> | RF   | Unitless                            | 36.39   | 0.06    | 1.67E-16 |
|                                             | AGWP | Unitless                            | 79.94   | 26.63   | 7.59     |
|                                             | AGTP | Unitless                            | 52.87   | 5.26    | 1.15     |

140

141 **Table S2.** Radiative forcing, absolute global warming potential (CAGWP), absolute global  
 142 temperature change potential (AGTP), and their ratios for 0.01 kg yr<sup>-1</sup> continuous emissions of  
 143 hydrogen, methane, and carbon dioxide under different timescales (i.e., 20, 100, and 500 years).

| Time horizon                                |       |                                     | 20       | 100       | 500        |
|---------------------------------------------|-------|-------------------------------------|----------|-----------|------------|
| Hydrogen (H <sub>2</sub> )                  | RF    | 10 <sup>-15</sup> W m <sup>-2</sup> | 818.78   | 986.26    | 986.43     |
|                                             | CAGWP | 10 <sup>-15</sup> W m <sup>-2</sup> | 10204.07 | 87233.27  | 481801.74  |
|                                             | AGTP  | 10 <sup>-15</sup> K                 | 390.55   | 619.83    | 822.23     |
| Methane (CH <sub>4</sub> )                  | RF    | 10 <sup>-15</sup> W m <sup>-2</sup> | 2426.52  | 2971.65   | 2972.27    |
|                                             | CAGWP | 10 <sup>-15</sup> W m <sup>-2</sup> | 30812.46 | 262161.26 | 1451060.68 |
|                                             | AGTP  | 10 <sup>-15</sup> K                 | 1159.75  | 1866.75   | 2477.35    |
| Carbon dioxide (CO <sub>2</sub> )           | RF    | 10 <sup>-15</sup> W m <sup>-2</sup> | 30.35    | 111.61    | 391.55     |
|                                             | CAGWP | 10 <sup>-15</sup> W m <sup>-2</sup> | 327.65   | 6204.51   | 110166.33  |
|                                             | AGTP  | 10 <sup>-15</sup> K                 | 13.41    | 64.04     | 289.99     |
| Ratio of H <sub>2</sub> to CO <sub>2</sub>  | RF    | Unitless                            | 26.97    | 8.84      | 2.52       |
|                                             | CAGWP | Unitless                            | 31.14    | 14.06     | 4.37       |
|                                             | AGTP  | Unitless                            | 29.12    | 9.68      | 2.84       |
| Ratio of CH <sub>4</sub> to CO <sub>2</sub> | RF    | Unitless                            | 79.94    | 26.63     | 7.59       |
|                                             | CAGWP | Unitless                            | 94.04    | 42.25     | 13.17      |
|                                             | AGTP  | Unitless                            | 86.47    | 29.15     | 8.54       |

144

145 **Table S3.** Radiative forcing, absolute global warming potential (AGWP), absolute global  
 146 temperature change potential (AGTP), and their ratios for 1 kg consumption of green and blue  
 147 hydrogen, and corresponding avoided CO<sub>2</sub> emissions under different timescales (i.e., 20, 100,  
 148 and 500 years).

| Emission assumptions                                     |      |                                     | 1% hydrogen and 1% methane |          |          | 10% hydrogen and 3% methane |          |          |
|----------------------------------------------------------|------|-------------------------------------|----------------------------|----------|----------|-----------------------------|----------|----------|
| Time horizon                                             |      |                                     | 20                         | 100      | 500      | 20                          | 100      | 500      |
| Green H <sub>2</sub>                                     | RF   | 10 <sup>-15</sup> W m <sup>-2</sup> | 0.15                       | 0.00     | 0.00     | 1.69                        | 0.00     | 0.00     |
|                                                          | AGWP | 10 <sup>-15</sup> W m <sup>-2</sup> | 8.27                       | 9.96     | 9.96     | 90.98                       | 109.58   | 109.60   |
|                                                          | AGTP | 10 <sup>-15</sup> K                 | 0.13                       | 0.01     | 0.00     | 1.46                        | 0.11     | 0.02     |
| Blue H <sub>2</sub>                                      | RF   | 10 <sup>-15</sup> W m <sup>-2</sup> | 1.55                       | 0.00     | 0.00     | 5.98                        | 0.01     | 0.00     |
|                                                          | AGWP | 10 <sup>-15</sup> W m <sup>-2</sup> | 81.80                      | 100.01   | 100.03   | 316.12                      | 385.30   | 385.38   |
|                                                          | AGTP | 10 <sup>-15</sup> K                 | 1.31                       | 0.10     | 0.02     | 5.05                        | 0.40     | 0.08     |
| Avoided CO <sub>2</sub>                                  | RF   | 10 <sup>-15</sup> W m <sup>-2</sup> | 13.98                      | 9.60     | 6.58     | 13.98                       | 9.60     | 6.58     |
|                                                          | AGWP | 10 <sup>-15</sup> W m <sup>-2</sup> | 333.90                     | 1227.72  | 4307.03  | 333.90                      | 1227.72  | 4307.03  |
|                                                          | AGTP | 10 <sup>-15</sup> K                 | 8.05                       | 6.49     | 5.87     | 8.05                        | 6.49     | 5.87     |
| Ratio of green H <sub>2</sub> to avoided CO <sub>2</sub> | RF   | Unitless                            | 0.01                       | 1.47E-05 | 4.03E-20 | 0.12                        | 1.62E-04 | 4.43E-19 |
|                                                          | AGWP | Unitless                            | 0.02                       | 0.01     | 2.31E-03 | 0.27                        | 0.09     | 0.03     |
|                                                          | AGTP | Unitless                            | 0.02                       | 1.60E-03 | 3.51E-04 | 0.18                        | 0.02     | 3.86E-03 |
| Ratio of blue H <sub>2</sub> to avoided CO <sub>2</sub>  | RF   | Unitless                            | 0.11                       | 1.81E-04 | 5.00E-19 | 0.43                        | 6.70E-04 | 1.85E-18 |
|                                                          | AGWP | Unitless                            | 0.24                       | 0.08     | 0.02     | 0.95                        | 0.31     | 0.09     |
|                                                          | AGTP | Unitless                            | 0.16                       | 0.02     | 3.53E-03 | 0.63                        | 0.06     | 0.01     |

149

150 **Table S4.** Radiative forcing, absolute global warming potential (CAGWP), absolute global  
 151 temperature change potential (AGTP), and their ratios for 0.01 kg yr<sup>-1</sup> continuous consumption  
 152 of green and blue hydrogen, and corresponding avoided CO<sub>2</sub> emission under different timescales  
 153 (i.e., 20, 100, and 500 years).

| Emission assumptions                                     |       |                                     | 1% hydrogen and 1% methane |          |            | 10% hydrogen and 3% methane |          |            |
|----------------------------------------------------------|-------|-------------------------------------|----------------------------|----------|------------|-----------------------------|----------|------------|
| Time horizon                                             |       |                                     | 20                         | 100      | 500        | 20                          | 100      | 500        |
| Green H <sub>2</sub>                                     | RF    | 10 <sup>-15</sup> W m <sup>-2</sup> | 8.27                       | 9.96     | 9.96       | 90.98                       | 109.58   | 109.60     |
|                                                          | CAGWP | 10 <sup>-15</sup> W m <sup>-2</sup> | 103.07                     | 881.14   | 4866.68    | 1133.79                     | 9692.59  | 53533.53   |
|                                                          | AGTP  | 10 <sup>-15</sup> K                 | 3.94                       | 6.26     | 8.31       | 43.39                       | 68.87    | 91.36      |
| Blue H <sub>2</sub>                                      | RF    | 10 <sup>-15</sup> W m <sup>-2</sup> | 81.80                      | 100.01   | 100.03     | 316.12                      | 385.30   | 385.38     |
|                                                          | CAGWP | 10 <sup>-15</sup> W m <sup>-2</sup> | 1036.78                    | 8825.42  | 48838.22   | 3992.67                     | 34016.83 | 188168.02  |
|                                                          | AGTP  | 10 <sup>-15</sup> K                 | 39.09                      | 62.83    | 83.38      | 151.00                      | 242.07   | 321.22     |
| Avoided CO <sub>2</sub>                                  | RF    | 10 <sup>-15</sup> W m <sup>-2</sup> | 333.90                     | 1227.72  | 4307.03    | 333.90                      | 1227.72  | 4307.03    |
|                                                          | CAGWP | 10 <sup>-15</sup> W m <sup>-2</sup> | 3604.19                    | 68249.57 | 1211829.61 | 3604.19                     | 68249.57 | 1211829.61 |
|                                                          | AGTP  | 10 <sup>-15</sup> K                 | 147.54                     | 704.40   | 3189.85    | 147.54                      | 704.40   | 3189.85    |
| Ratio of green H <sub>2</sub> to avoided CO <sub>2</sub> | RF    | Unitless                            | 0.02                       | 0.01     | 2.31E-03   | 0.27                        | 0.09     | 0.03       |
|                                                          | CAGWP | Unitless                            | 0.03                       | 0.01     | 4.02E-03   | 0.31                        | 0.14     | 0.04       |
|                                                          | AGTP  | Unitless                            | 0.03                       | 0.01     | 2.60E-03   | 0.29                        | 0.10     | 0.03       |
| Ratio of blue H <sub>2</sub> to avoided CO <sub>2</sub>  | RF    | Unitless                            | 0.24                       | 0.08     | 0.02       | 0.95                        | 0.31     | 0.09       |
|                                                          | CAGWP | Unitless                            | 0.29                       | 0.13     | 0.04       | 1.11                        | 0.50     | 0.16       |
|                                                          | AGTP  | Unitless                            | 0.26                       | 0.09     | 0.03       | 1.02                        | 0.34     | 0.10       |

154



155 **Reference**

156 Ocko and Hamburg: Climate consequences of hydrogen emissions, Atmos. Chem. Phys.  
157 Discuss., 2022.

158 Warwick, Griffiths, Keeble, Archibald, and Pyle: Atmospheric implications of increased  
159 Hydrogen use, AvailableAt: <https://assets>, 2022.
