# Supplementary material for: Comment on “Climate consequences of hydrogen emissions” by Ocko and Hamburg (2022)
Source: Copernicus journal article supplement (doi:10.5194/acp-2022-810), 2022-12-19
Supplement: Supplementary file [file acp-2022-810-AC3-supplement.pdf]

1 Reviewer #2

2 This long and somewhat tedious algebraic expansion of ordinary differential equations used to  
3 describe atmospheric chemistry and global warming begins on the wrong foot, and fails to  
4 produce any enlightening results. In the Discussion and the Conclusions, the paper reiterates  
5 well established facts about greenhouse gas warming and draws mainly policy conclusions. It  
6 does not really belong in a science journal like ACP.

7 Despite our difference of opinion regarding whether our work belongs in ACP, we thank the  
8 reviewer for comments that materially improved our manuscript.

9 Our manuscript draws no policy conclusions. Our conclusions all state empirical information  
10 about radiative forcing or temperature changes from greenhouse gases, or they are statements of  
11 mathematical fact. We note the policy relevance of our work, but make no policy  
12 recommendations or conclusions.

13 We are not claiming that our results are novel, except that we found a small error in the work of  
14 Ocko and Hamburg (2022) repeating the same error in Warwick et al. (2022). We choice to  
15 submit our results as a commentary to ACP with the hope to provide important context to  
16 complement results of Ocko and Hamburg (2022). We now have sentences to emphasize our  
17 motivation that read:

18 *“In this commentary, we provide additional context for Ocko and Hamburg (2022) related to the*  
19 *climate consequences of replacing fossil fuels with clean hydrogen alternatives.”*

20 *“Ocko and Hamburg (2022) defined a metric based on time-integrated radiative forcing from*  
21 *continuous emissions. To complement their analysis, we further present results for temperature*  
22 *and radiative forcing over the next centuries for unit pulse and continuous emissions scenarios.*  
23 *Our results are qualitatively consistent with previous studies, including Ocko and Hamburg*  
24 *(2022).”*

25 *“Our aim here is to complement Ocko and Hamburg (2022), which emphasizes the near term,*  
26 *with an analysis that places greater emphasis on long-term outcomes using newly developed*  
27 *equations.”*

28 This is written as a commentary on Ocko and Hamburg’s 2022 paper. At 18 pages of text, this is  
29 hardly a Commentary.

30 We agree with the reviewer that parts were a little wordier than needed. The abstract is now cut  
31 down to 227 words. The Introduction is now 233 words. We then have 7 pages of Methods and  
32 Equations, which is a concise tutorial for the derivation of equations found in Warwick et al  
33 (2022) and Ocko and Hamburg (2022). There are three concise pages of Results, two concise  
34 pages of Discussion and slightly over one concise page of Conclusions. This comes to 14 pages  
35 plus Abstract. We note that there are no specific page limits for commentaries in ACP, but of  
36 course concision is always appreciated.

37 We believe that the derivations of the equations are important in the main paper, as this  
38 derivation is not provided by Ocko and Hamburg (2022) nor Warwick et al. (2022). The  
39 derivation of the equations is not trivial. In fact, in the process of re-deriving these equations, we  
40 found a minor error in an integral presented in Warwick et al. (2022), as confirmed in a Zoom  
41 call and follow-up emails with the author team of Warwick et a. (2022). The fact that no  
42 derivation was shown and there is an error in the derivation is one of the issues we are trying to  
43 fix with our commentary.

44 [The authors propose that this work goes way beyond Ocko and Hamburg because it considers](#)  
45 [impacts out to 500 years does not make sense to this reviewer because any of the impacts of](#)  
46 [CH<sub>4</sub>-H<sub>2</sub> emissions disappear after 4-5 decades.](#)

47 We do not understand how the reviewer got the impression that we claimed our work goes “way  
48 beyond” that of Ocko and Hamburg (2022). We would be happy to add additional language that  
49 would serve to dispel this notion. In our Abstract, we wrote:

50 *"In this commentary, we provide additional context for Ocko and Hamburg (2022) related to the*  
51 *climate consequences of replacing fossil fuels with clean hydrogen alternatives."*

52 Our purpose was to reproduce their results and provide additional understanding of and context  
53 for those results. Our work aims to complement Ocko and Hamburg (2022) by be asking readers  
54 to consider the long atmospheric lifetime of CO<sub>2</sub> when assessing the relative costs and benefits  
55 of hydrogen emissions.

56 The reviewer is right about the short lifetime of methane and hydrogen. The reason we are  
57 showing longer time scales is to contrast this short lifetime with the relatively long lifetime of  
58 CO<sub>2</sub>. We have a sentence in our abstract that reads:

59 *“After a cessation of clean hydrogen consumption, the earth cools rapidly, whereas after a*  
60 *cessation of carbon dioxide emissions, the earth continues to warm somewhat and remains warm*  
61 *for many centuries.”*

62 We also have a sentence in Conclusion that reads:

63 *“In contrast to the climate impact of carbon dioxide emissions, which persist for many millennia*  
64 *(Archer, 2005; Solomon et al., 2009), climate impacts decay on the timescale of decades after a*  
65 *cessation of methane or hydrogen emissions.”*

66 Admittedly fossil carbon counts as CO<sub>2</sub> does accumulate, but that is a different accounting and  
67 does not need the following of H<sub>2</sub> and CH<sub>4</sub> as done here. Thus integrating their equations out 500  
68 years depends solely on the scenario for future technology and energy use at year 2600. This is  
69 not a scientific issue.

70 We did not make it sufficiently clear that we are doing highly stylized calculations of the sort  
71 performed by Ocko and Hamburg (2022). We are not making predictions or projections related  
72 to real energy systems. In a linear system, consequences of any time-varying forcing can be  
73 represented by a convolution integral of either a unit-pulse emission or a continuous emission.  
74 We are deriving the sort of equation that could be used in a Green’s function calculation and not  
75 trying to represent any real emissions trajectory. We have added the following to the beginning  
76 of our Methods section:

77 *“We estimate the global mean temperature change from emissions of CO<sub>2</sub>, CH<sub>4</sub>, or H<sub>2</sub> using a*  
78 *linearized Green’s function approach, and apply these equations to simple idealized cases.”*

79 Their step-by-step tutorial might be useful somewhere if they had not missed the point entirely  
80 about indirect greenhouse gases (CO, H<sub>2</sub>) and chemical feedbacks (CH<sub>4</sub>). The authors  
81 demonstrate a basic lack of knowledge of the first principles of atmospheric chemistry. The  
82 concept of steady state and how it relates to the pulsed emissions is well known but seems to be  
83 overlooked here (e.g. lines 22-23). From the start (e.g., equation 1-3) the authors miss the point  
84 that their ‘taus’ are not constant but through chemical feedbacks depend on the second-order  
85 terms. Moreover, the budget lifetime used in the continuity equations (‘tau’) is most often NOT  
86 the time scale for decay of a perturbation.

87 One of the authors of this commentary (Caldeira) co-authored a paper on the non-linearities and  
88 scenario dependency in radiative forcing in a study published 30 years ago (Caldeira and  
89 Kasting, 1993, Insensitivity of global warming potentials to carbon dioxide emission scenarios,  
90 Nature 366), so we are well aware of the issues raised by the reviewer. Our goal here was to  
91 follow the practice of Warwick et al (2022) and Ocko and Hamburg (2022) in using a  
92 linearization around a time-invariant background state.

93 In our Discussion section we wrote:

94 *“The radiative forcing calculation presented here is a linear approximation, with radiative*  
95 *forcing increasing linearly with concentration, when in fact absorption bands become*  
96 *increasingly saturated at higher concentrations, and this results in less sensitivity at higher*  
97 *concentrations. The radiative forcing calculation assumes an unchanging background*  
98 *atmospheric composition, whereas it is likely that the climate impact of an emission will depend*  
99 *on the background climate state (Duan et al., 2019; Robrecht et al., 2019). For instance, the*  
100 *indirect radiative forcing of hydrogen through its effect on methane’s lifetime might depend on*  
101 *the background methane concentration. The effectiveness of radiative forcing at affecting*  
102 *temperature can vary substantially from gas to gas (Hansen et al., 1997; Modak et al., 2018).”*

103 While we agree with the reviewer that it would be good to take into consideration these non-  
104 linearities, the derivations of the radiative forcing impact for hydrogen follows the same  
105 assumptions that are used for Warwick et al (2021) and Ocko and Hamburg (2022) so that  
106 everything is under the same framework. Incidentally, our understanding is that the convention is  
107 to use a constant atmosphere because the scientists want the number to be based on something  
108 that everyone can agree on and measure. If GWP values were to be defined in terms of future  
109 anticipated atmospheric concentrations, there would be no uniformly agreed upon scenario to  
110 serve as a basis for this calculation.

111 In responding to the reviewer’s comment, we have changed the word “lifetime” to “perturbation  
112 lifetime” in the paper.

113 This manuscript is clearly not a tutorial. The concept of perturbation lifetime, budget lifetime and  
114 timescales is well known. As is the decomposition of the decaying perturbation into a sum of  
115 exponential decays as is done for CO<sub>2</sub>. See for example,

116 [IPCC WGI AR4 7.4.5.2](#)

117 AR5 8.2.3.3

118 AR6 7.6.1.1, 7.6.1.5

119 Holmes, C. D. (2018). Methane feedback on atmospheric chemistry: Methods, models, and  
120 mechanisms. *Journal of Advances in Modeling Earth Systems*, 10, 1087–1099.

121 <https://doi.org/10.1002/2017MS00119>

122 Fuglestedt, J. S., Isaksen, I., & Wang, W.-C. (1996). Estimates of indirect global warming  
123 potentials for CH<sub>4</sub>, CO and NO<sub>x</sub>. *Climatic Change*, 34(3–4), 405–437.

124 Prather, M. (1994). Lifetimes and eigenstates in atmospheric chemistry. *Geophysical Research*  
125 *Letters*, 21(9), 801–804. <http://doi.org/10.1029/94GL00840>

126 Prather, M. J. (2007). Lifetimes and time scales in atmospheric chemistry. *Philosophical*  
127 *Transactions of the Royal Society A*, 365(1856), 1705–1726.

128 <http://doi.org/10.1098/rsta.2007.2040>

129 Nguyen, N. H., Turner, A. J., Yin, Y., et al (2020). Effects of chemical feedbacks on decadal  
130 methane emissions estimates. *Geophysical Research Letters*, 47, e2019GL085706.

131 [doi.org/10.1029/2019GL085706](https://doi.org/10.1029/2019GL085706).

132 The Merriam Webster defines “tutorial” to mean “a paper ... that provides practical information  
133 about a specific subject”. If we understand the reviewer correctly, the assumption is that we are  
134 trying to go “far beyond” Ocko and Hamburg (2022) and do something that was novel. However,  
135 our goal was to provide context for and help explain the results of Ocko and Hamburg (2022).  
136 Our understanding is that the word “tutorial” typically refers to the teaching of material that is  
137 well-understood by experts.

138 The derivations of equations describing the radiative forcing from hydrogen emissions are based  
139 on Warwick et al. (2022), and other equations, including radiative forcing from CO<sub>2</sub> and  
140 methane emissions and the temperature response function, are directly taken from previous  
141 papers that are cited in our text. For example, we have added sentences that read:

142 *“We derive and apply the equations underlying the estimate of radiative forcing from hydrogen*  
143 *emissions as presented by Warwick et al. (2022), relying heavily on parameter values from Ocko*  
144 *and Hamburg (2022), Table S1. Equations describing the radiative forcing of CO<sub>2</sub> and CH<sub>4</sub> is*

145 *based on Myhre et al. (2013). The calculation of the global mean temperature response is based*  
146 *on Gasser et al. (2017).”*
